# Supplementary material
Source: PubMed Central journal article supplement (PMC357054)

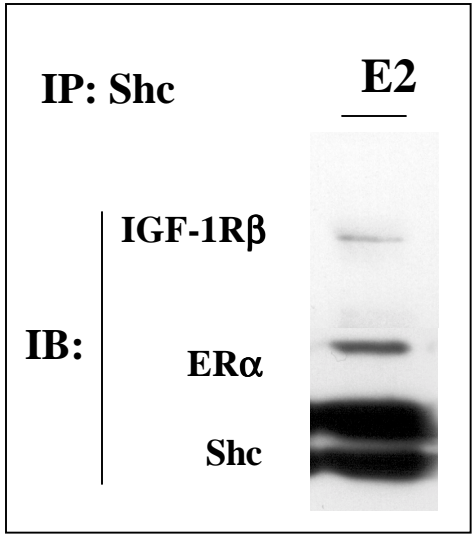

Supplement: pnas_0308334100_3.pdf [file pnas_0308334100_3.pdf]

**A**

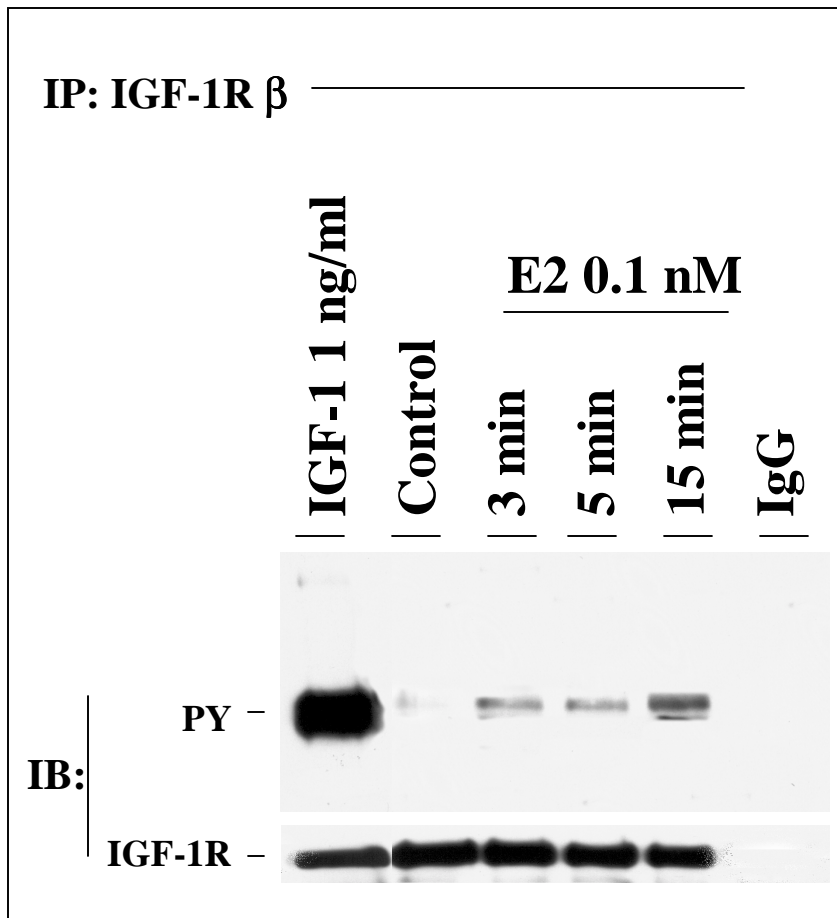

**B**

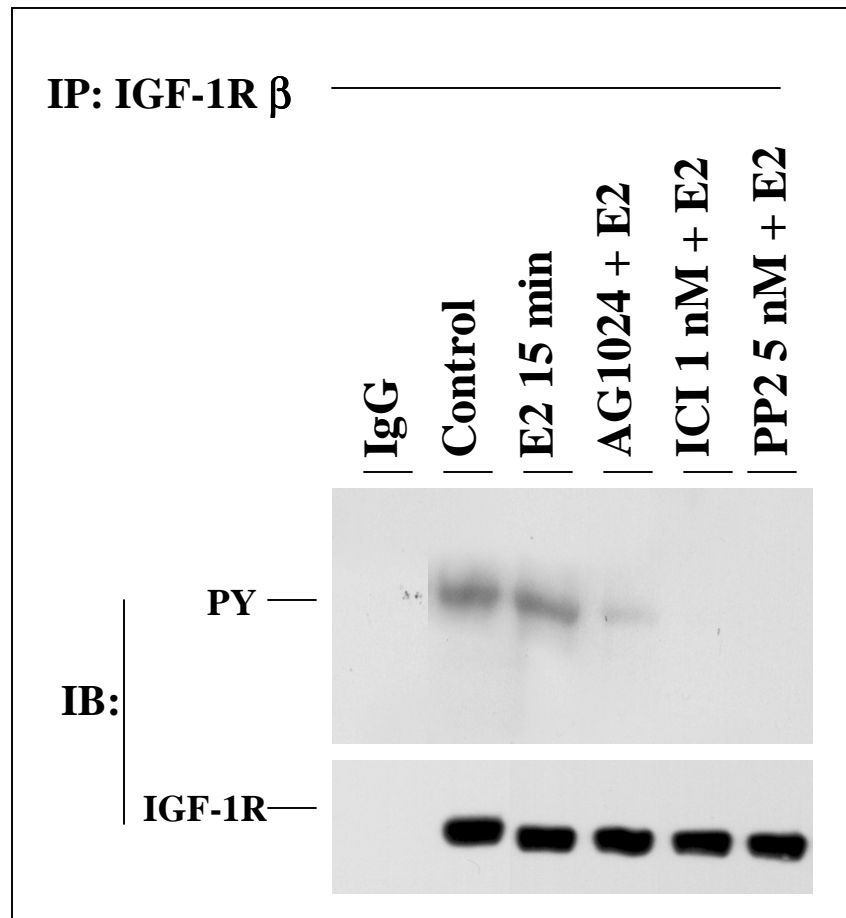

Supplement: pnas_0308334100_5.pdf [file pnas_0308334100_5.pdf]

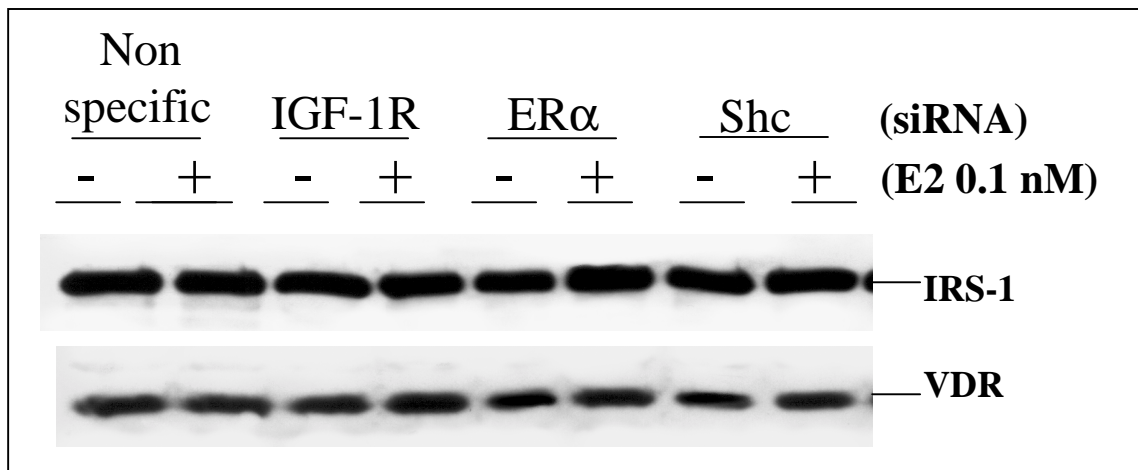

Supplement: pnas_0308334100_7.pdf [file pnas_0308334100_7.pdf]

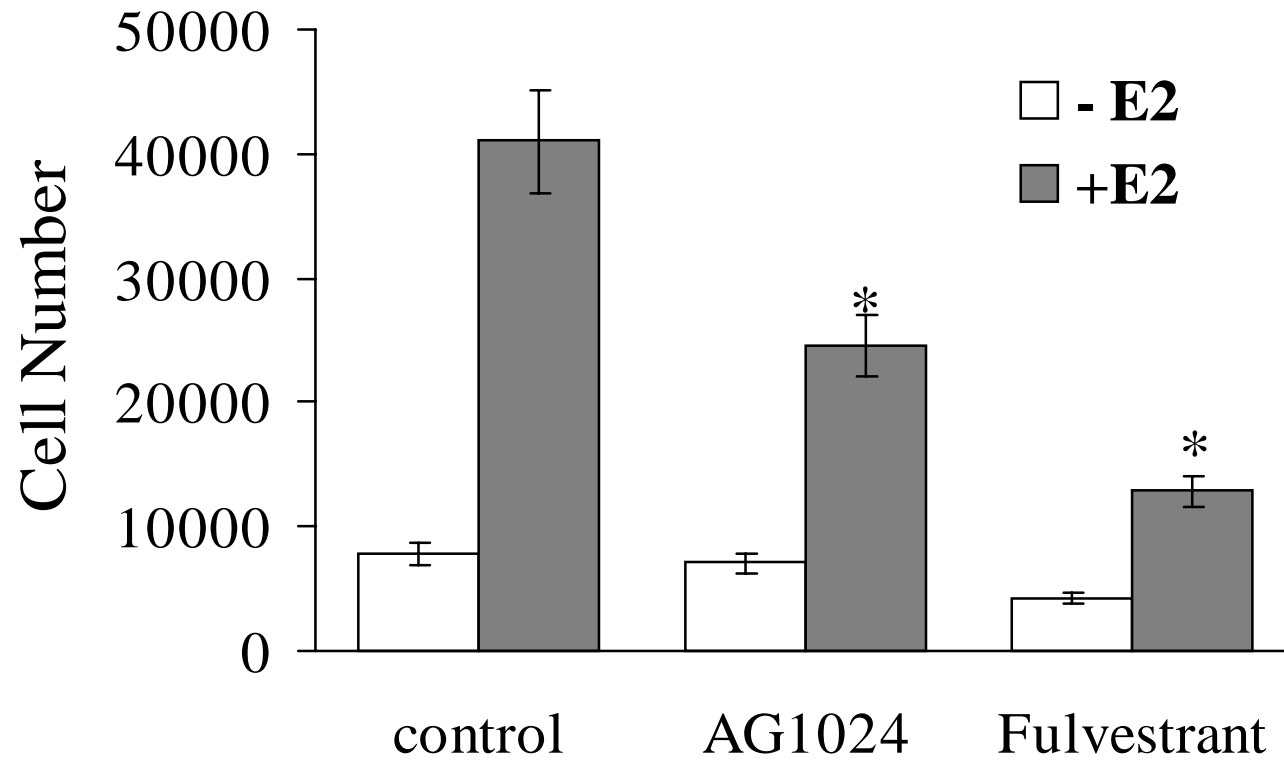

Supplement: pnas_0308334100_9.pdf [file pnas_0308334100_9.pdf]
